# Supplementary material
Source: Springer Nature journal article supplement (https://www.springermedizin.de/resource/supplementary/12958_2005_221_MOESM1_ESM.pdf/9567394)

**40 kDa**

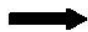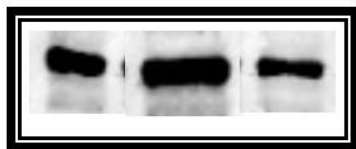

1

2

3

**tubulin**

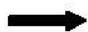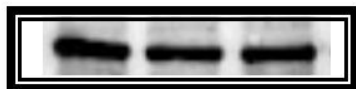

1

2

3

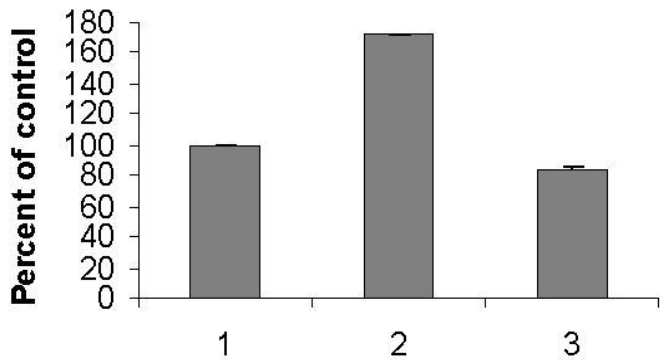

Supplement: MOESM1 [file 9567394]
